# Supplementary material
Source: bioRxiv or medRxiv preprint supplement (https://www.biorxiv.org/highwire/filestream/27190/field_highwire_adjunct_files/0/094060-1.pdf)

# Expression distribution

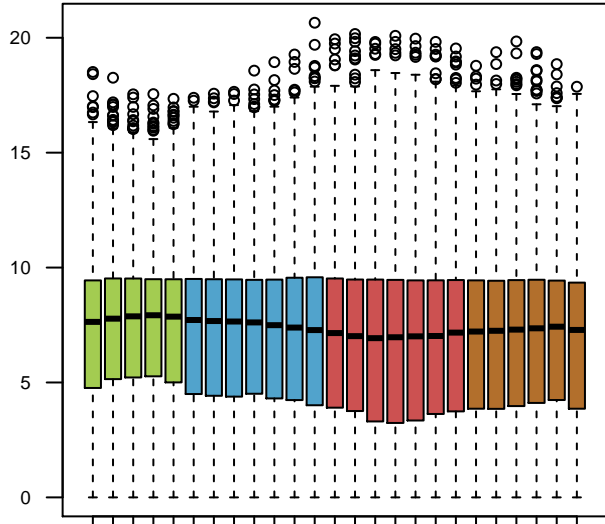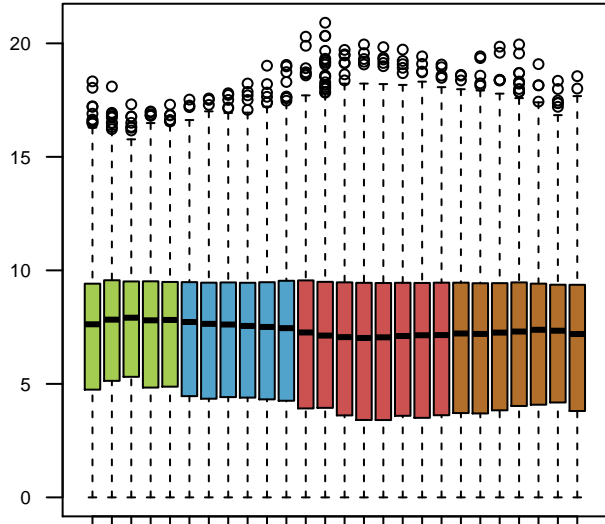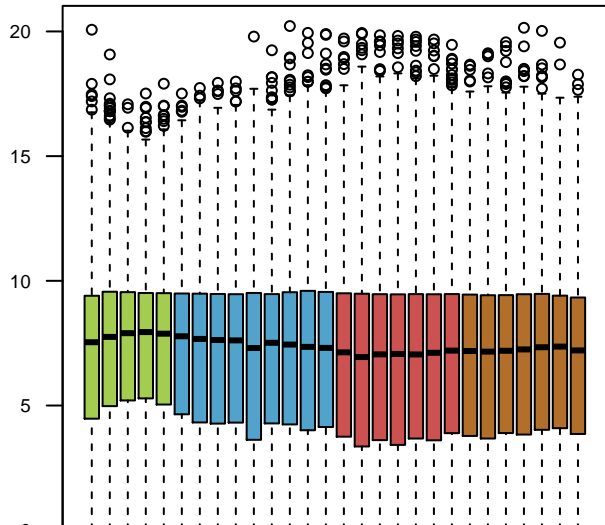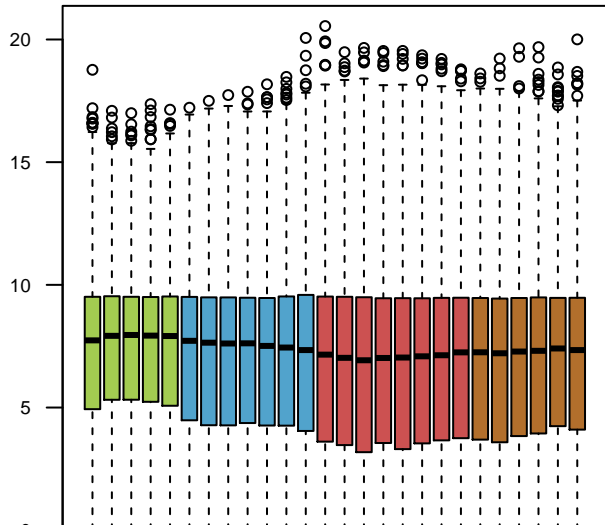

# Genes with expression > 3

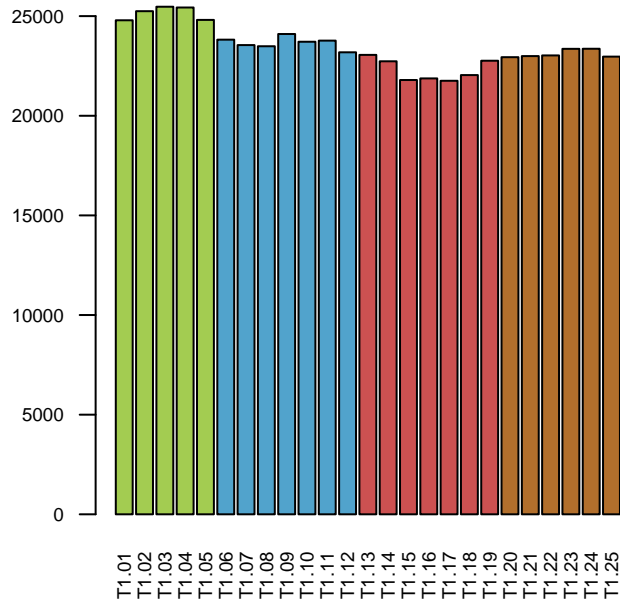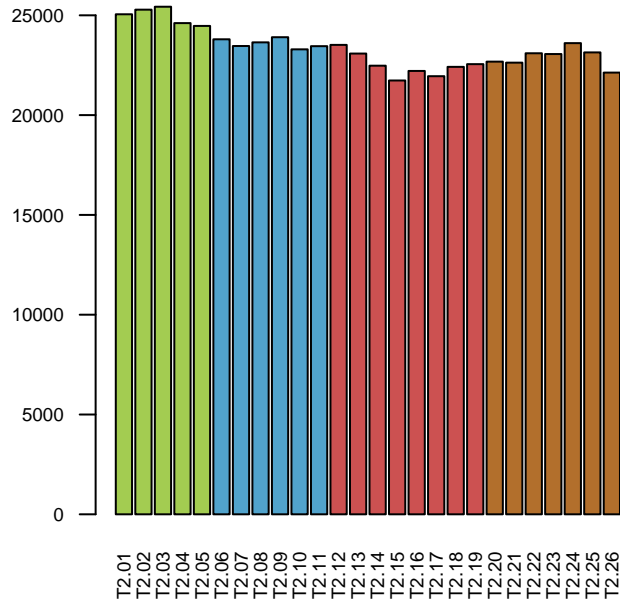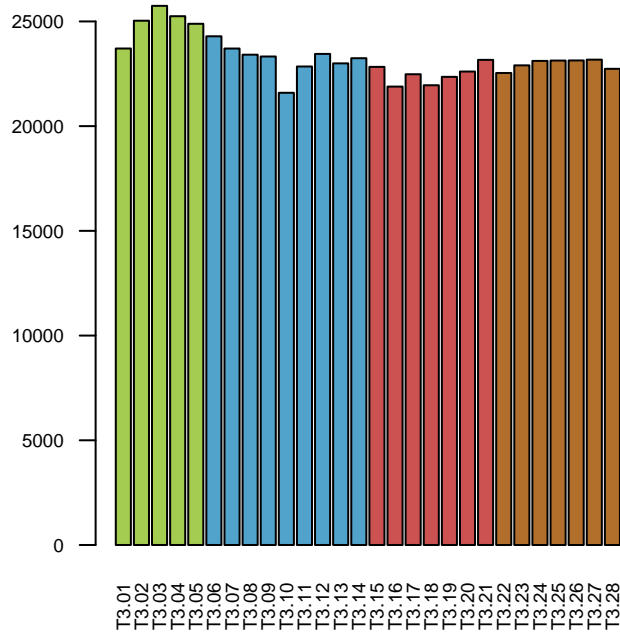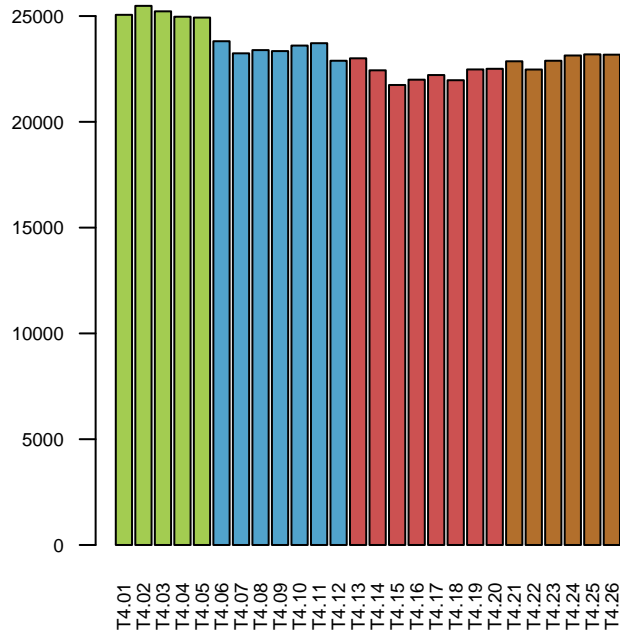

# Genes with expression > 15

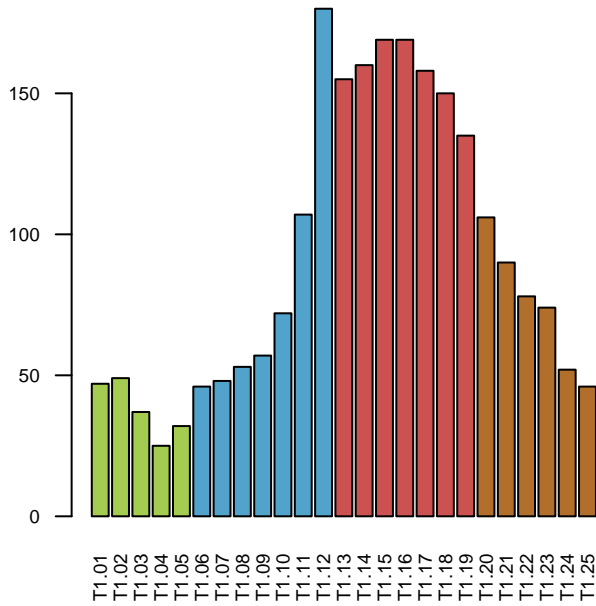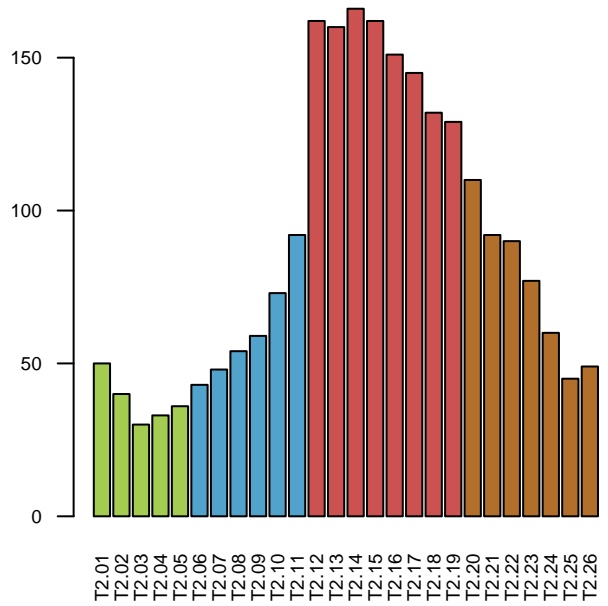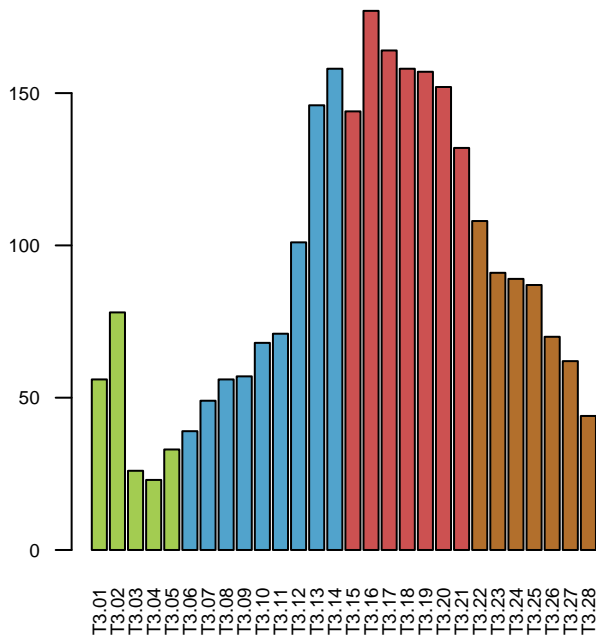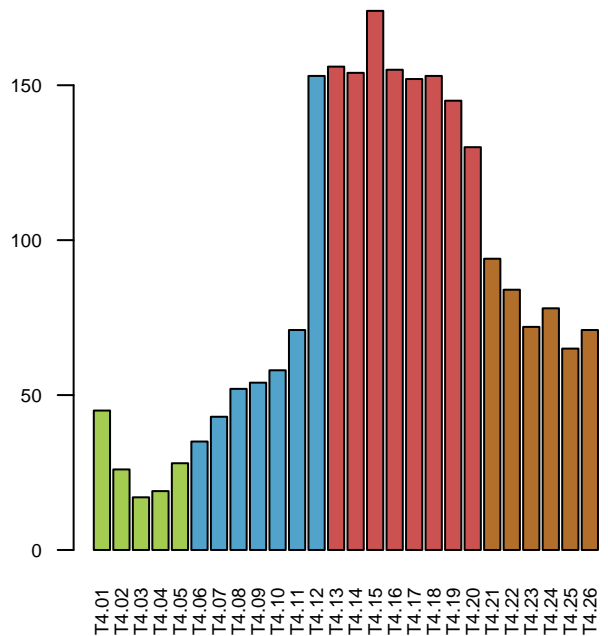

# Genes accounting for 90% of expression

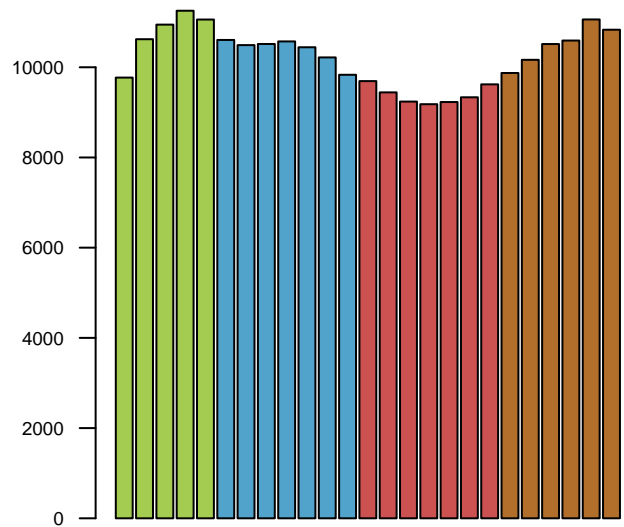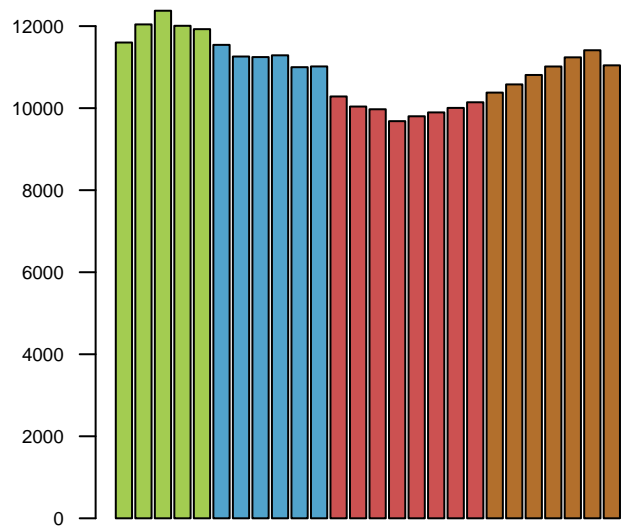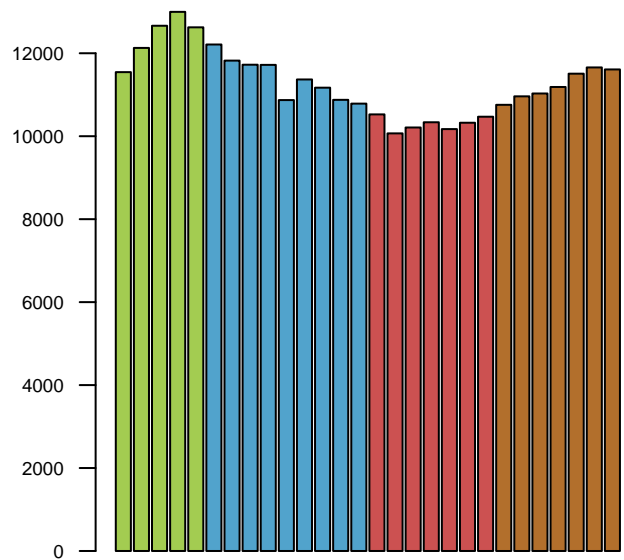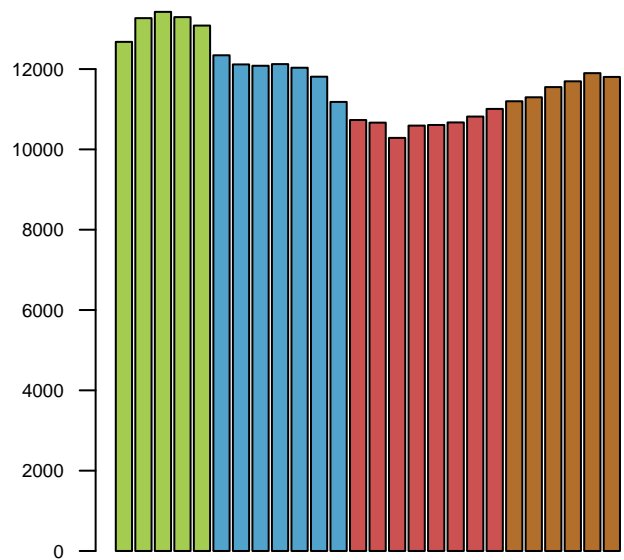

Supplement: Supplementary file [file 094060-1.pdf]
